# Supplementary material
Source: MDPI journal article supplement (https://www.mdpi.com/2227-7102/13/4/410)
Supplement: s1 [file s1 › education-2309662-supplementary.pdf]

# Supplementary materials of “What is the Impact of ChatGPT on Education? A Rapid Review of the Literature”

Table S1. A summary of the included articles ( $N = 50$ ).

| No. | Author(s)                  | Posted/published date | Title                                                                                                                                               | Source                                               | Link                                                                                                            |
|-----|----------------------------|-----------------------|-----------------------------------------------------------------------------------------------------------------------------------------------------|------------------------------------------------------|-----------------------------------------------------------------------------------------------------------------|
| 1.  | Ali                        | 12 February 2023      | Let the Devil Speak for Itself: Should ChatGPT be Allowed or Banned in Hospitality and Tourism Schools?                                             | Journal of Global Hospitality and Tourism            | <a href="https://digitalcommons.usf.edu/jght/vol2/iss1/1/">https://digitalcommons.usf.edu/jght/vol2/iss1/1/</a> |
| 2.  | Al-Worafi et al.           | 23 February 2023      | Artificial Intelligence Use in University: Should We Ban ChatGPT?                                                                                   | Preprints.org                                        | <a href="https://doi.org/10.20944/preprints202302.0400.v1">https://doi.org/10.20944/preprints202302.0400.v1</a> |
| 3.  | Atlas                      | 2 February 2023       | ChatGPT for Higher Education and Professional Development: A Guide to Conversational AI                                                             | University of Rhode Island, USA                      | <a href="https://digitalcommons.uri.edu/cba_facpubs/548">https://digitalcommons.uri.edu/cba_facpubs/548</a>     |
| 4.  | Baidoo-Anu and Owusu Ansah | 27 January 2023       | Education in the Era of Generative Artificial Intelligence (AI): Understanding the Potential Benefits of ChatGPT in Promoting Teaching and Learning | SSRN.com                                             | <a href="https://doi.org/10.2139/ssrn.4337484">https://doi.org/10.2139/ssrn.4337484</a>                         |
| 5.  | Bašić et al.               | 9 February 2023       | Better by You, Better than Me? ChatGPT-3 as Writing Assistance in Students' Essays                                                                  | arXiv.org                                            | <a href="https://doi.org/10.48550/arXiv.2302.04536">https://doi.org/10.48550/arXiv.2302.04536</a>               |
| 6.  | Bishop                     | 26 January 2023       | A Computer Wrote this Paper: What ChatGPT Means for Education, Research, and Writing                                                                | SSRN.com                                             | <a href="https://doi.org/10.2139/ssrn.4338981">https://doi.org/10.2139/ssrn.4338981</a>                         |
| 7.  | Buchberger                 | January 2023          | Is ChatGPT Smarter than Master's Applicants?                                                                                                        | Research Institute for Symbolic Computation, Austria | <a href="https://doi.org/10.35011/risc.23-04">https://doi.org/10.35011/risc.23-04</a>                           |
| 8.  | Choi et al.                | 25 January 2023       | Chatgpt Goes to Law School.                                                                                                                         | SSRN.com                                             | <a href="https://doi.org/10.2139/ssrn.4335905">https://doi.org/10.2139/ssrn.4335905</a>                         |

| No. | Author(s)       | Posted/published date | Title                                                                                                                                                                 | Source                             | Link                                                                                                                                                                                                                                                                |
|-----|-----------------|-----------------------|-----------------------------------------------------------------------------------------------------------------------------------------------------------------------|------------------------------------|---------------------------------------------------------------------------------------------------------------------------------------------------------------------------------------------------------------------------------------------------------------------|
| 9.  | Cotton et al.   | 13 March 2023         | Chatting and Cheating: Ensuring Academic Integrity in the Era of ChatGPT                                                                                              | EdArXiv.org                        | <a href="https://doi.org/10.35542/osf.io/mrz8h">https://doi.org/10.35542/osf.io/mrz8h</a>                                                                                                                                                                           |
| 10. | de Winter       | March 2023            | Can ChatGPT Pass High School Exams on English Language Comprehension?                                                                                                 | ResearchGate.net                   | <a href="https://www.researchgate.net/publication/366659237_Can_Ch atGPT_pass_high_school_exa ms_on_English_Language_Co mprehension">https://www.researchgate.net/publication/366659237_Can_Ch atGPT_pass_high_school_exa ms_on_English_Language_Co mprehension</a> |
| 11. | Fijačko et al.  | 10 February 2023      | Can ChatGPT Pass the Life Support Exams without Entering the American Heart Association Course?                                                                       | Resuscitation                      | <a href="https://doi.org/10.1016/j.resuscitation.2023.109732">https://doi.org/10.1016/j.resuscitation.2023.109732</a>                                                                                                                                               |
| 12. | Frieder et al.  | 31 January 2023       | Mathematical Capabilities of ChatGPT                                                                                                                                  | arXiv.org                          | <a href="https://doi.org/10.48550/arXiv.2301.13867">https://doi.org/10.48550/arXiv.2301.13867</a>                                                                                                                                                                   |
| 13. | García-Peñalvo  | 6 February 2023       | The Perception of Artificial Intelligence in Educational Contexts after the Launch of ChatGPT: Disruption or Panic?                                                   | Education in the Knowledge Society | <a href="https://doi.org/10.14201/eks.31279">https://doi.org/10.14201/eks.31279</a>                                                                                                                                                                                 |
| 14. | Geerling et al. | 14 February 2023      | Is ChatGPT Smarter than a Student in Principles of Economics?                                                                                                         | SSRN.com                           | <a href="https://doi.org/10.2139/ssrn.4356034">https://doi.org/10.2139/ssrn.4356034</a>                                                                                                                                                                             |
| 15. | Gilson et al.   | 8 February 2023       | How does CHATGPT Perform on the United States Medical Licensing Examination? The Implications of Large Language Models for Medical Education and Knowledge Assessment | JMIR Medical Education             | <a href="https://doi.org/10.2196/45312">https://doi.org/10.2196/45312</a>                                                                                                                                                                                           |
| 16. | Han et al.      | 21 February 2023      | An Explorative Assessment of ChatGPT as an Aid in Medical Education: Use it with Caution                                                                              | medRxiv.org                        | <a href="https://doi.org/10.1101/2023.02.13.23285879">https://doi.org/10.1101/2023.02.13.23285879</a>                                                                                                                                                               |

| No. | Author(s)      | Posted/published date | Title                                                                                                                                                          | Source                                                   | Link                                                                                                      |
|-----|----------------|-----------------------|----------------------------------------------------------------------------------------------------------------------------------------------------------------|----------------------------------------------------------|-----------------------------------------------------------------------------------------------------------|
| 17. | Hargreaves     | 15 February 2023      | ‘Words are Flowing out Like Endless Rain into a Paper Cup’: ChatGPT & Law School Assessments                                                                   | SSRN.org                                                 | <a href="https://doi.org/10.2139/ssrn.4359407">https://doi.org/10.2139/ssrn.4359407</a>                   |
| 18. | Hisan and Amri | January 2023          | ChatGPT and Medical Education: A Double-Edged Sword                                                                                                            | ResearchGate.net                                         | <a href="https://doi.org/10.13140/RG.2.2.31280.23043/1">https://doi.org/10.13140/RG.2.2.31280.23043/1</a> |
| 19. | Huh            | 11 January 2023       | Are ChatGPT’s Knowledge and Interpretation Ability Comparable to Those of Medical Students in Korea for Taking a Parasitology Examination? A Descriptive Study | Journal of Educational Evaluation for Health Professions | <a href="https://doi.org/10.3352/jeehp.2023.20.1">https://doi.org/10.3352/jeehp.2023.20.1</a>             |
| 20. | Jalil et al.   | 7 February 2023       | ChatGPT and Software Testing Education: Promises & Perils                                                                                                      | arXiv.org                                                | <a href="https://doi.org/10.48550/arXiv.2302.03287">https://doi.org/10.48550/arXiv.2302.03287</a>         |
| 21. | Kasneci et al. | 2 February 2023       | ChatGPT for Good? On Opportunities and Challenges of Large Language Models for Education                                                                       | EdArXiv.org                                              | <a href="https://doi.org/10.35542/osf.io/5er8f">https://doi.org/10.35542/osf.io/5er8f</a>                 |
| 22. | Khalil and Er  | 8 February 2023       | Will ChatGPT Get You Caught? Rethinking of Plagiarism Detection                                                                                                | arXiv.org                                                | <a href="https://doi.org/10.48550/arXiv.2302.04335">https://doi.org/10.48550/arXiv.2302.04335</a>         |
| 23. | Khan et al.    | 16 February 2023      | ChatGPT – Reshaping Medical Education and Clinical Management                                                                                                  | Pakistan Journal of Medical Sciences                     | <a href="https://doi.org/10.12669/pjms.39.2.7653">https://doi.org/10.12669/pjms.39.2.7653</a>             |
| 24. | King           | 2 January 2023        | A Conversation on Artificial Intelligence, Chatbots, and Plagiarism in Higher Education                                                                        | Cellular and Molecular Bioengineering                    | <a href="https://doi.org/10.1007/s12195-022-00754-8">https://doi.org/10.1007/s12195-022-00754-8</a>       |
| 25. | Kung et al.    | 9 February 2023       | Performance of ChatGPT on USMLE: Potential for AI-assisted Medical Education Using Large Language Models                                                       | PLOS Digital Health                                      | <a href="https://doi.org/10.1371/journal.pdig.0000198">https://doi.org/10.1371/journal.pdig.0000198</a>   |
| 26. | Marusenko      | February 2023         | New Challenges in Assessing Students’ Knowledge: Chatbot ChatGPT and Real-time Deepfakes                                                                       | ResearchGate.net                                         | <a href="https://doi.org/10.13140/RG.2.2.21715.25120">https://doi.org/10.13140/RG.2.2.21715.25120</a>     |

| No. | Author(s)           | Posted/published date | Title                                                                                                                             | Source                                             | Link                                                                                                      |
|-----|---------------------|-----------------------|-----------------------------------------------------------------------------------------------------------------------------------|----------------------------------------------------|-----------------------------------------------------------------------------------------------------------|
| 27. | Mbakwe et al.       | 9 February 2023       | ChatGPT Passing USMLE Shines a Spotlight on the Flaws of Medical Education                                                        | PLOS Digital Health                                | <a href="https://doi.org/10.1371/journal.pdig.0000205">https://doi.org/10.1371/journal.pdig.0000205</a>   |
| 28. | Megahed             | 17 February 2023      | How Generative AI Models such as ChatGPT Can be (Mis)Used in SPC Practice, Education, and Research? An Exploratory Study          | arXiv.org                                          | <a href="https://doi.org/10.48550/arXiv.2302.10916">https://doi.org/10.48550/arXiv.2302.10916</a>         |
| 29. | Mogali              | 7 February 2023       | Initial Impressions of ChatGPT for Anatomy Education                                                                              | Anatomical Sciences Education                      | <a href="https://doi.org/10.1002/asc.2261">https://doi.org/10.1002/asc.2261</a>                           |
| 30. | Newton              | 22 February 2023      | ChatGPT Performance on MCQ-based Exams                                                                                            | EdArXiv.org                                        | <a href="https://doi.org/10.35542/osf.io/sytu3">https://doi.org/10.35542/osf.io/sytu3</a>                 |
| 31. | Nisar and Aslam     | 17 January 2023       | Is ChatGPT a Good Tool for T&CM Students in Studying Pharmacology?                                                                | SSRN.com                                           | <a href="https://doi.org/10.2139/ssrn.4324310">https://doi.org/10.2139/ssrn.4324310</a>                   |
| 32. | Pardos and Bhandari | 14 February 2023      | Learning Gain Differences between ChatGPT and Human Tutor Generated Algebra Hints                                                 | arXiv.org                                          | <a href="https://doi.org/10.48550/arXiv.2302.06871">https://doi.org/10.48550/arXiv.2302.06871</a>         |
| 33. | Pavlik              | 7 January 2023        | Collaborating with ChatGPT: Considering the Implications of Generative Artificial Intelligence for Journalism and Media Education | Journalism & Mass Communication Educator           | <a href="https://doi.org/10.1177/10776958221149577">https://doi.org/10.1177/10776958221149577</a>         |
| 34. | Perkins             | 22 February 2023      | Academic Integrity Considerations of AI Large Language Models in the Post-pandemic Era: ChatGPT and beyond                        | Journal of University Teaching & Learning Practice | <a href="https://doi.org/10.53761/1.20.02.07">https://doi.org/10.53761/1.20.02.07</a>                     |
| 35. | Qadir               | 31 December 2022      | Engineering Education in the Era of ChatGPT: Promise and Pitfalls of Generative AI for Education                                  | TechRxiv.org                                       | <a href="https://doi.org/10.36227/techrxiv.21789434.v1">https://doi.org/10.36227/techrxiv.21789434.v1</a> |
| 36. | Rospigliosi         | 22 February 2023      | Artificial Intelligence in Teaching and Learning: What Questions Should We Ask of ChatGPT?                                        | Interactive Learning Environments                  | <a href="https://doi.org/10.1080/10494820.2023.2180191">https://doi.org/10.1080/10494820.2023.2180191</a> |

| No. | Author(s)             | Posted/published date | Title                                                                                                                       | Source                                 | Link                                                                                                  |
|-----|-----------------------|-----------------------|-----------------------------------------------------------------------------------------------------------------------------|----------------------------------------|-------------------------------------------------------------------------------------------------------|
| 37. | Rudolph et al.        | 24 January 2023       | ChatGPT: Bullshit Spewer or the End of Traditional Assessments in Higher Education?                                         | Journal of Applied Learning & Teaching | <a href="https://doi.org/10.37074/jalt.2023.6.1.9">https://doi.org/10.37074/jalt.2023.6.1.9</a>       |
| 38. | Shiri                 | 16 February 2023      | ChatGPT and Academic Integrity                                                                                              | SSRN.com                               | <a href="https://doi.org/10.2139/ssrn.4360052">https://doi.org/10.2139/ssrn.4360052</a>               |
| 39. | Stutz et al.          | 24 February 2023      | Ch(e)atGPT? An Anecdotal Approach on the Impact of ChatGPT on Teaching and Learning GIScience                               | EdArXiv.org                            | <a href="https://doi.org/10.35542/osf.io/j3m9b">https://doi.org/10.35542/osf.io/j3m9b</a>             |
| 40. | Susnjak               | 19 December 2022      | ChatGPT: The End of Online Exam Integrity?                                                                                  | arXiv.org                              | <a href="https://doi.org/10.48550/arXiv.2212.09292">https://doi.org/10.48550/arXiv.2212.09292</a>     |
| 41. | Szabo                 | 22 February 2023      | ChatGPT a Breakthrough in Science and Education: Can it Fail a Test?                                                        | OSFpreprints.org                       | <a href="https://doi.org/10.31219/osf.io/ks365">https://doi.org/10.31219/osf.io/ks365</a>             |
| 42. | Tlili et al.          | 22 February 2023      | What if the Devil is My Guardian Angel: ChatGPT as a Case Study of Using Chatbots in Education                              | Smart Learning Environments            | <a href="https://doi.org/10.1186/s40561-023-00237-x">https://doi.org/10.1186/s40561-023-00237-x</a>   |
| 43. | Topsakal and Topsakal | 31 December 2022      | Framework for a Foreign Language Teaching Software for Children Utilizing AR, Voicebots and ChatGPT (Large Language Models) | The Journal of Cognitive Systems       | <a href="https://doi.org/10.52876/jcs.1227392">https://doi.org/10.52876/jcs.1227392</a>               |
| 44. | Ventayen              | 23 February 2023      | ChatGPT by OpenAI: Students' Viewpoint on Cheating using Artificial Intelligence-based Application                          | SSRN.com                               | <a href="https://doi.org/10.2139/ssrn.4361548">https://doi.org/10.2139/ssrn.4361548</a>               |
| 45. | Ventayen              | 24 January 2023       | OpenAI ChatGPT Generated Results: Similarity Index of Artificial Intelligence-based Contents                                | SSRN.com                               | <a href="https://doi.org/10.2139/ssrn.4332664">https://doi.org/10.2139/ssrn.4332664</a>               |
| 46. | Wang et al.           | 16 February 2023      | ChatGPT Performs on the Chinese National Medical Licensing Examination                                                      | ResearchSquare.com                     | <a href="https://doi.org/10.21203/rs.3.rs-2584079/v1">https://doi.org/10.21203/rs.3.rs-2584079/v1</a> |
| 47. | Willems               | 24 January 2023       | ChatGPT at Universities – The Least of Our Concerns                                                                         | SSRN.com                               | <a href="https://doi.org/10.2139/ssrn.4334162">https://doi.org/10.2139/ssrn.4334162</a>               |

| No. | Author(s) | Posted/published date | Title                                                                                                                                                                | Source           | Link                                                                                                  |
|-----|-----------|-----------------------|----------------------------------------------------------------------------------------------------------------------------------------------------------------------|------------------|-------------------------------------------------------------------------------------------------------|
| 48. | Zhai      | 25 January 2023       | ChatGPT for Next Generation Science Learning                                                                                                                         | SSRN.com         | <a href="https://doi.org/10.2139/ssrn.4331313">https://doi.org/10.2139/ssrn.4331313</a>               |
| 49. | Zhai      | 4 January 2023        | ChatGPT User Experience: Implications for Education                                                                                                                  | SSRN.com         | <a href="https://doi.org/10.2139/ssrn.4312418">https://doi.org/10.2139/ssrn.4312418</a>               |
| 50. | Zhang     | January 2023          | Preparing Educators and Students for ChatGPT and AI Technology in Higher Education: Benefits, Limitations, Strategies, and Implications of ChatGPT & AI Technologies | ResearchGate.net | <a href="https://doi.org/10.13140/RG.2.2.32105.98404">https://doi.org/10.13140/RG.2.2.32105.98404</a> |
